# Supplementary material for: Surface functionalization of natural lignin isolated from Aloe barbadensis Miller biomass by atom transfer radical polymerization for enhanced anticancer efficacy
Source: Royal Society of Chemistry journal article supplement (doi:10.1039/c6ra01866a), 2016-01-01
Supplement: c6ra01866a1.pdf [file c6ra01866a1.pdf]

## **Supporting Information**

**Surface functionalization of natural lignin isolated from *Aloe barbadensis***

**Miller biomass via atom transfer radical polymerization to enhanced anticancer efficacy**

Murugaraj Jeyaraj <sup>a</sup>, Rajendran Amarnath Praphakar <sup>b</sup>, Chinnusamy Rajendran <sup>b</sup>,  
Deepalekshmi Ponnammac, Kishor Kumar Sadasivuni<sup>c</sup>, Murugan A. Munusamy<sup>d</sup>, Mariappan  
Rajan <sup>b\*</sup>

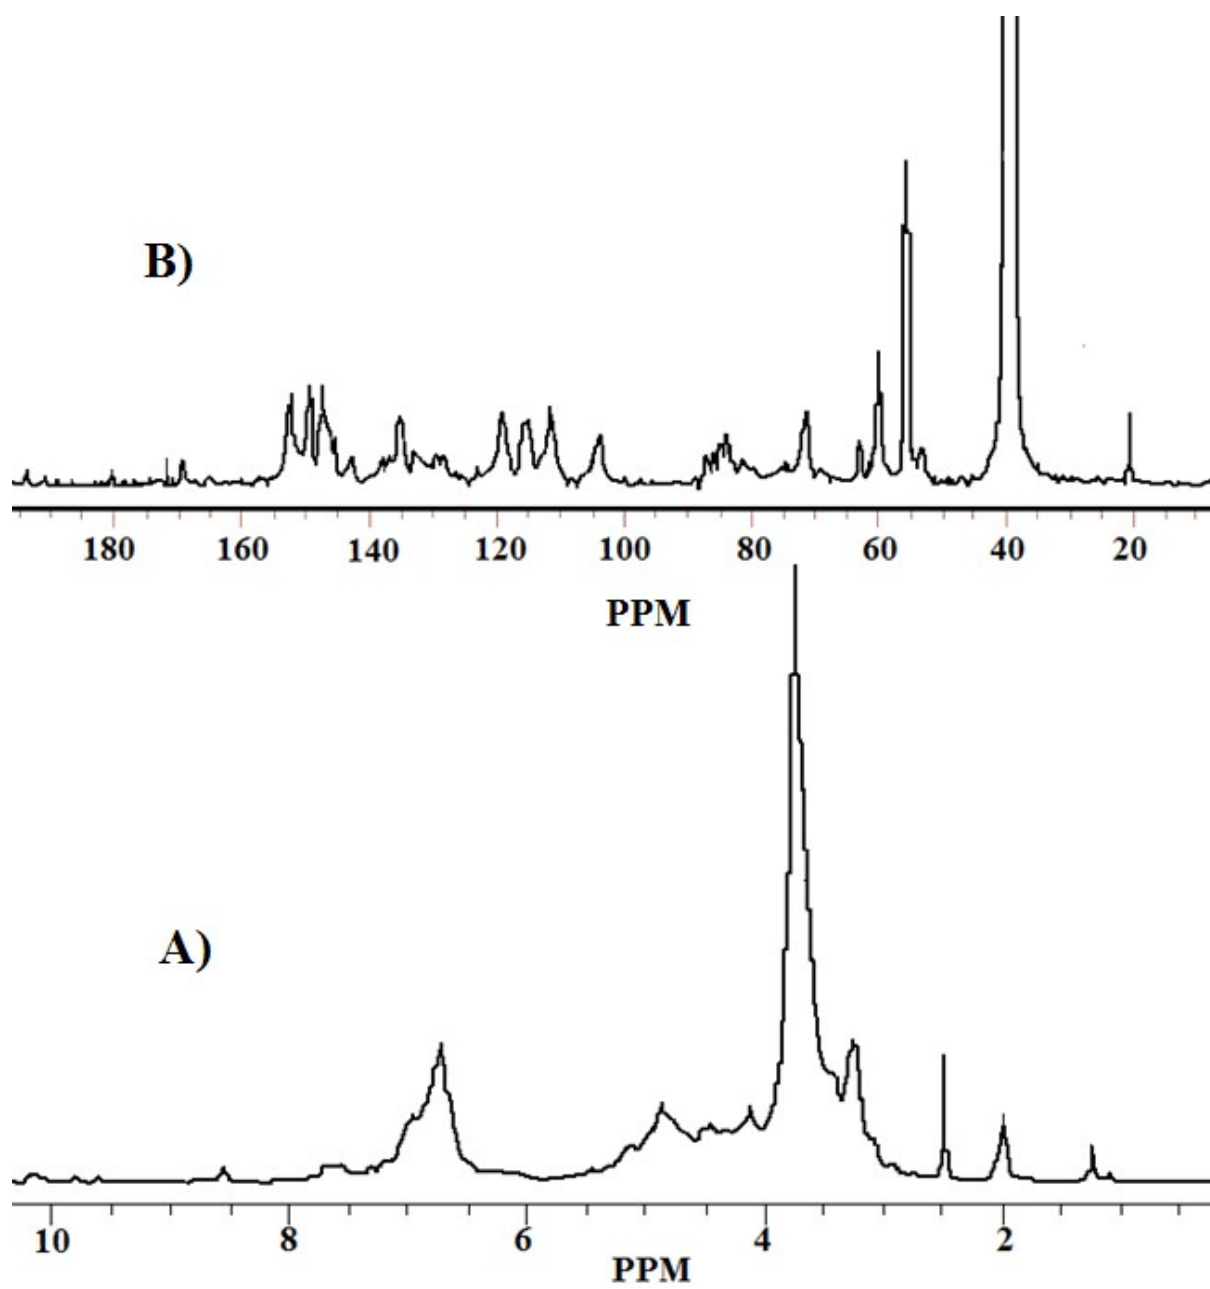

**Figure S1.**  $^1\text{H}$  (A),  $^{13}\text{C}$  (B) NMR spectrum of commercial lignin

EOS Plot / Distribution Graph

S/N : 116109

|                  |                                  |                  |
|------------------|----------------------------------|------------------|
| User : Common    | Group :                          | Repetition : 1/1 |
| Date : 7/22/2015 | File Name : chem_20150722_163559 |                  |
| Time : 16:35:59  | Sample Information : lig         |                  |
| SOP Name : Water | Security : No Security           |                  |

Version 2.21 / 2.03

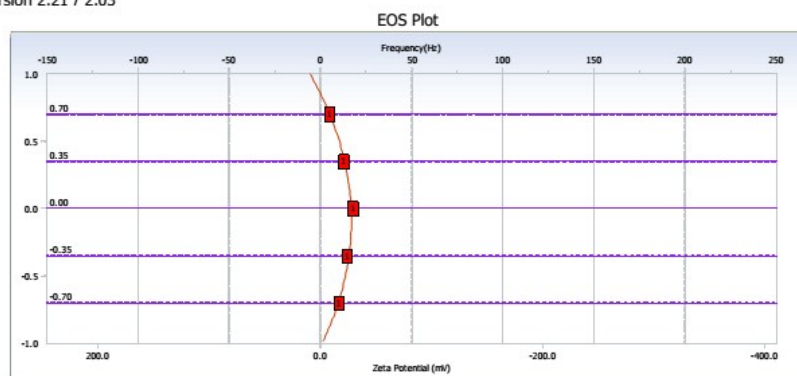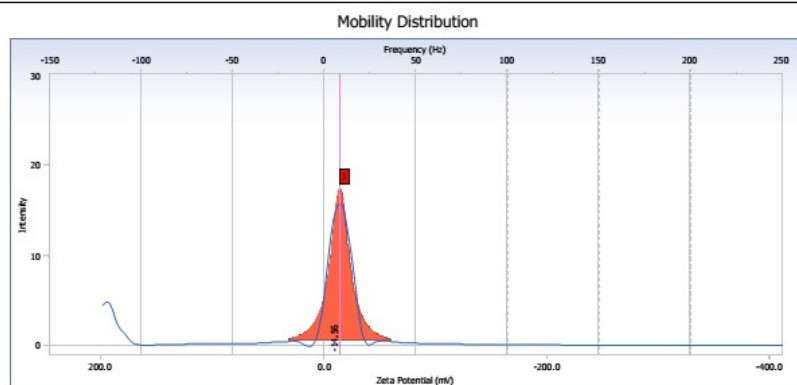

**Measurement Results**

|                               |               |                       |                           |          |      |
|-------------------------------|---------------|-----------------------|---------------------------|----------|------|
| Zeta Potential                | : -14.56      | (mV)                  | Doppler shift             | : 8.87   | (Hz) |
| Mobility                      | : -1.135e-004 | (cm <sup>2</sup> /Vs) | Base Frequency            | : 111.6  | (Hz) |
| Conductivity                  | : 1.6487      | (mS/cm)               |                           |          |      |
| <b>Zeta Potential of Cell</b> |               |                       | <b>Diluent Properties</b> |          |      |
| Upper Surface                 | : -23.67      | (mV)                  | Diluent Name              | : WATER  |      |
| Lower Surface                 | : -12.99      | (mV)                  | Temperature               | : 25.0   | (°C) |
| <b>Cell Condition</b>         |               |                       | Refractive Index          | : 1.3328 |      |
| Cell Type                     | : Flow Cell   |                       | Viscosity                 | : 0.8878 | (cP) |
| Avg. Electric Field           | : -16.17      | (V/cm)                | Dielectric Constant       | : 78.3   |      |
| Avg. Current                  | : -1.33       | (mA)                  |                           |          |      |

**Fig S2.** Zeta pontential value of isolated Lignin

EOS Plot / Distribution Graph

S/N : 116109

|                  |                                         |                  |
|------------------|-----------------------------------------|------------------|
| User : Common    | Group :                                 | Repetition : 1/1 |
| Date : 8/19/2015 | File Name : chem_20150819_120608        |                  |
| Time : 12:06:08  | Sample Information : dl-Lig-PH LIG-g-MA |                  |
| SOP Name : Water | Security : No Security                  |                  |

Version 2.21 / 2.03

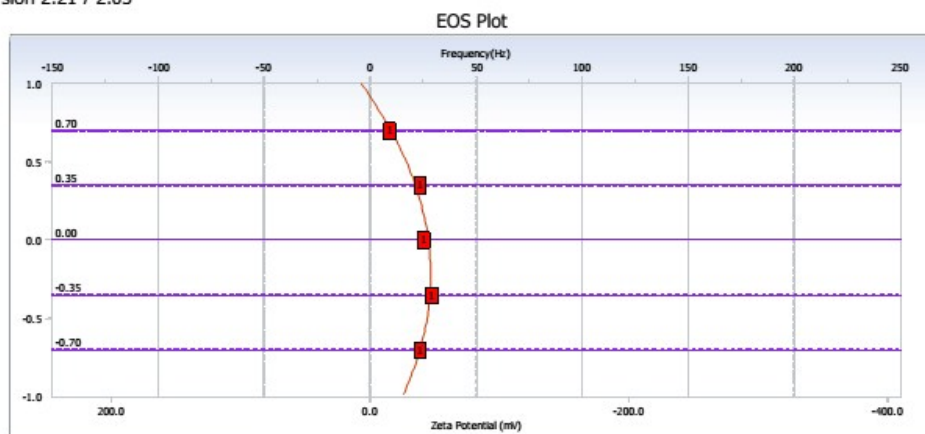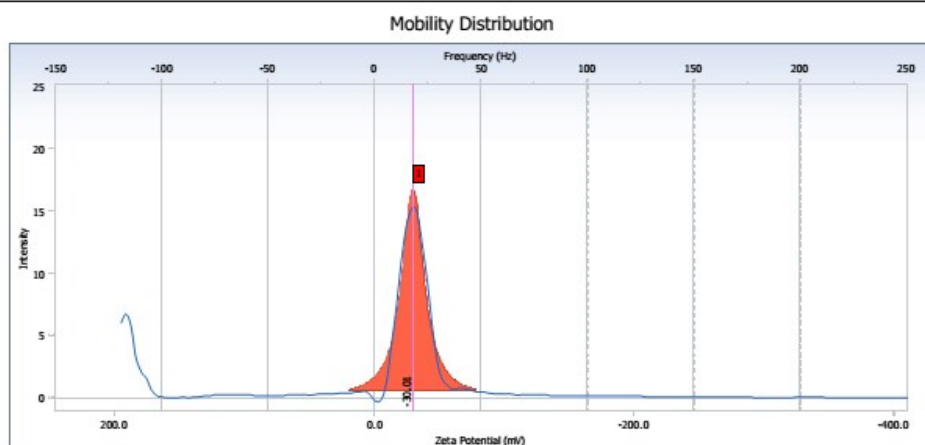

#### Measurement Results

|                        |               |                       |                     |          |      |
|------------------------|---------------|-----------------------|---------------------|----------|------|
| Zeta Potential         | : -30.01      | (mV)                  | Doppler shift       | : 18.32  | (Hz) |
| Mobility               | : -2.340e-004 | (cm <sup>2</sup> /Vs) | Base Frequency      | : 112.2  | (Hz) |
| Conductivity           | : 1.2363      | (mS/cm)               |                     |          |      |
| Zeta Potential of Cell |               |                       | Diluent Properties  |          |      |
| Upper Surface          | : -36.72      | (mV)                  | Diluent Name        | : WATER  |      |
| Lower Surface          | : -5.18       | (mV)                  | Temperature         | : 25.0   | (°C) |
| Cell Condition         |               |                       | Refractive Index    | : 1.3328 |      |
| Cell Type              | : Flow Cell   |                       | Viscosity           | : 0.8878 | (cP) |
| Avg. Electric Field    | : -16.20      | (V/cm)                | Dielectric Constant | : 78.3   |      |
| Avg. Current           | : -1.00       | (mA)                  |                     |          |      |

**Fig S3.** Zeta pontential value of LIG-g-MA halo-nanocarrier

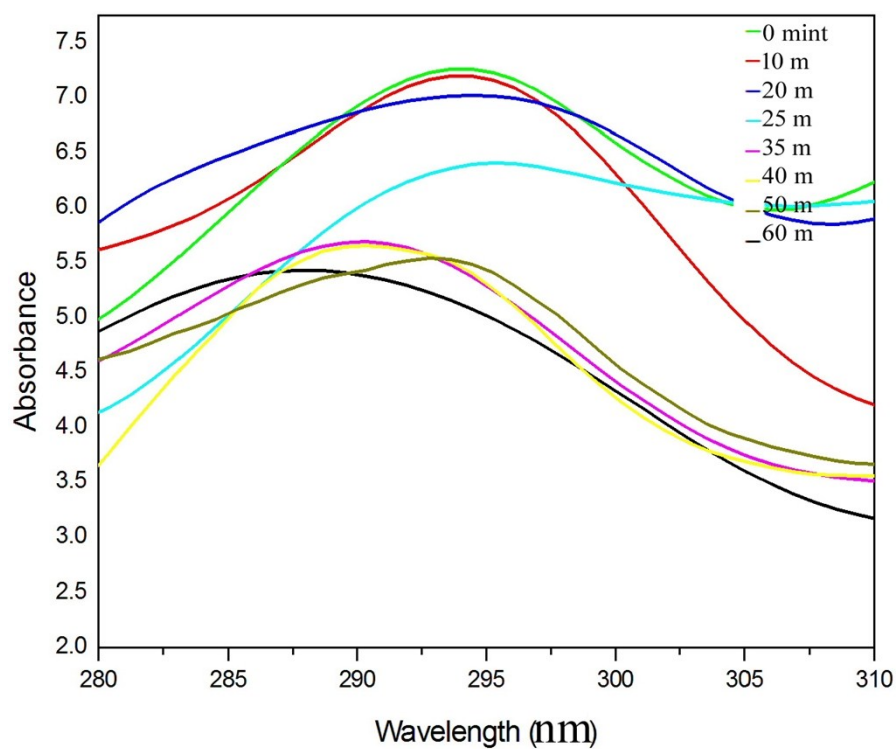

**Fig S4.** Encapsulation effiecy of LIG-g-MA halo-nanocarrier

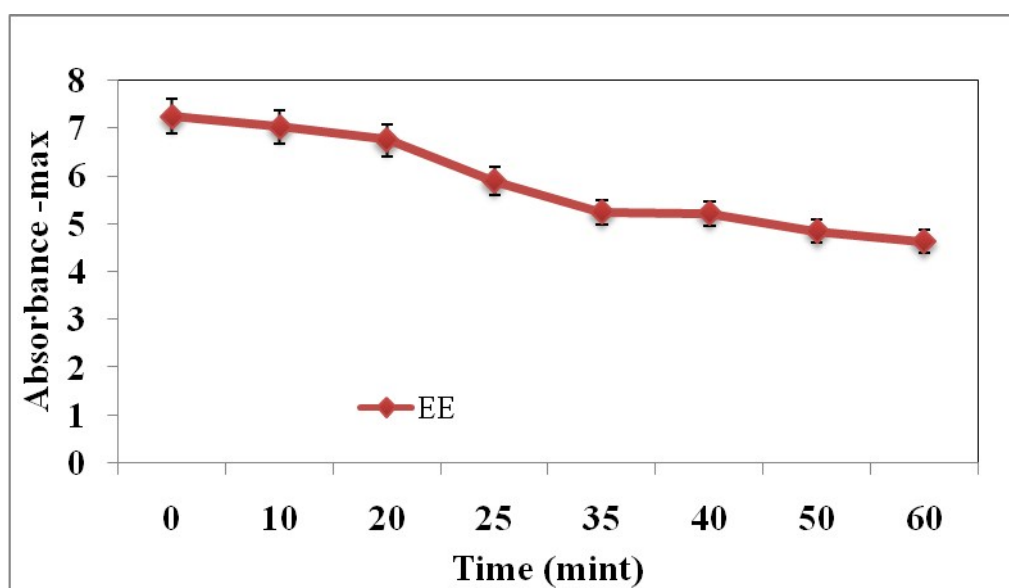

**Fig S5.** Encapsulation efficiency of LIG-g-MA holo-nanocarrier at different time intervals

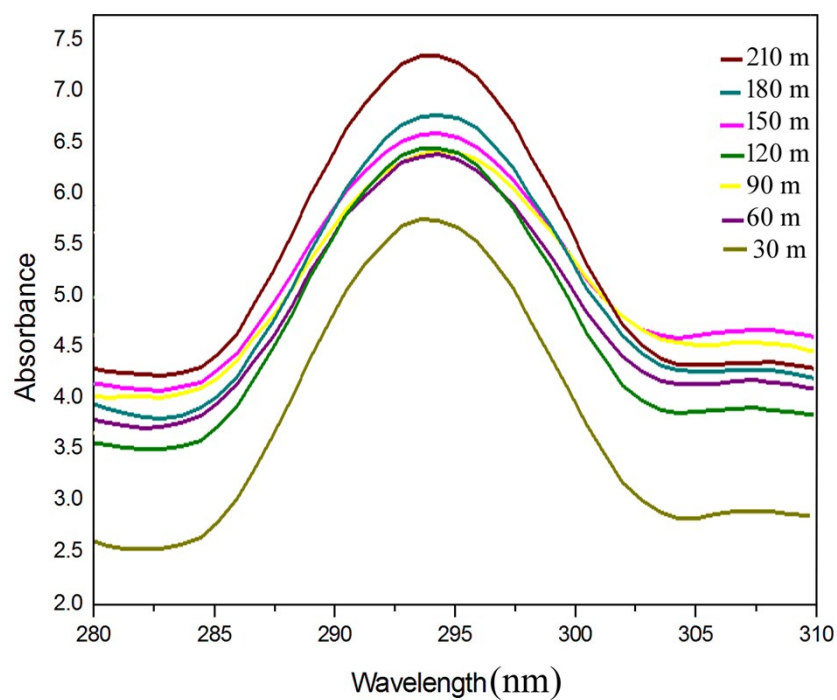

**Fig S6.** *In-vitro* drug release of LIG-g-MA halo-nanocarrier at pH 2.4 medium

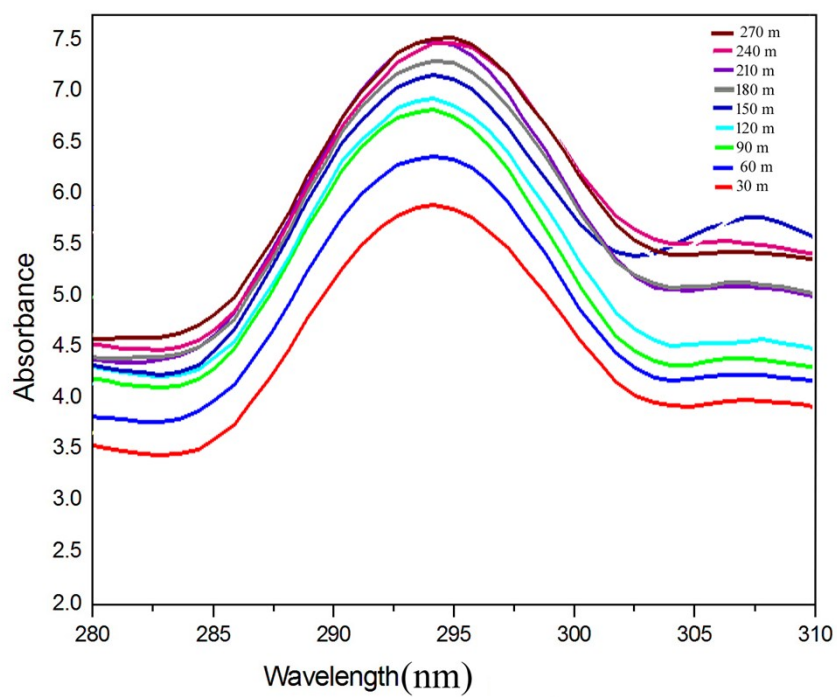

**Fig S7.** *In-vitro* drug release of LIG-g-MA halo-nanocarrier at pH 6.8 medium

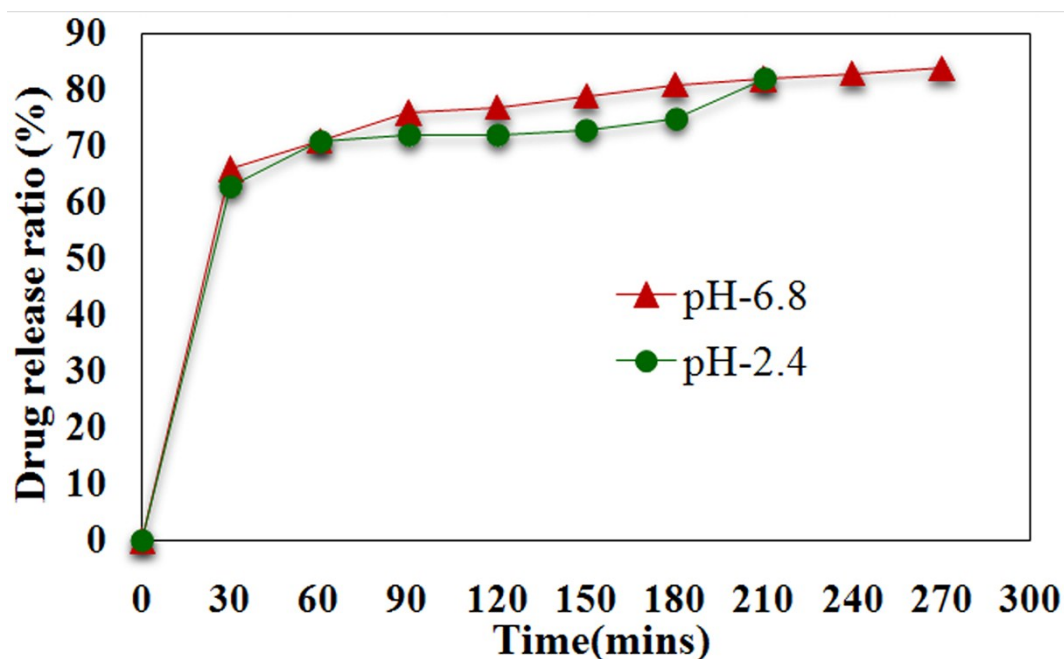

**Fig S8.** The study of *in-vitro* 5-FU release from LIG-g-MA holo-nanocarrier at pH 2.4 and 6.8 medium

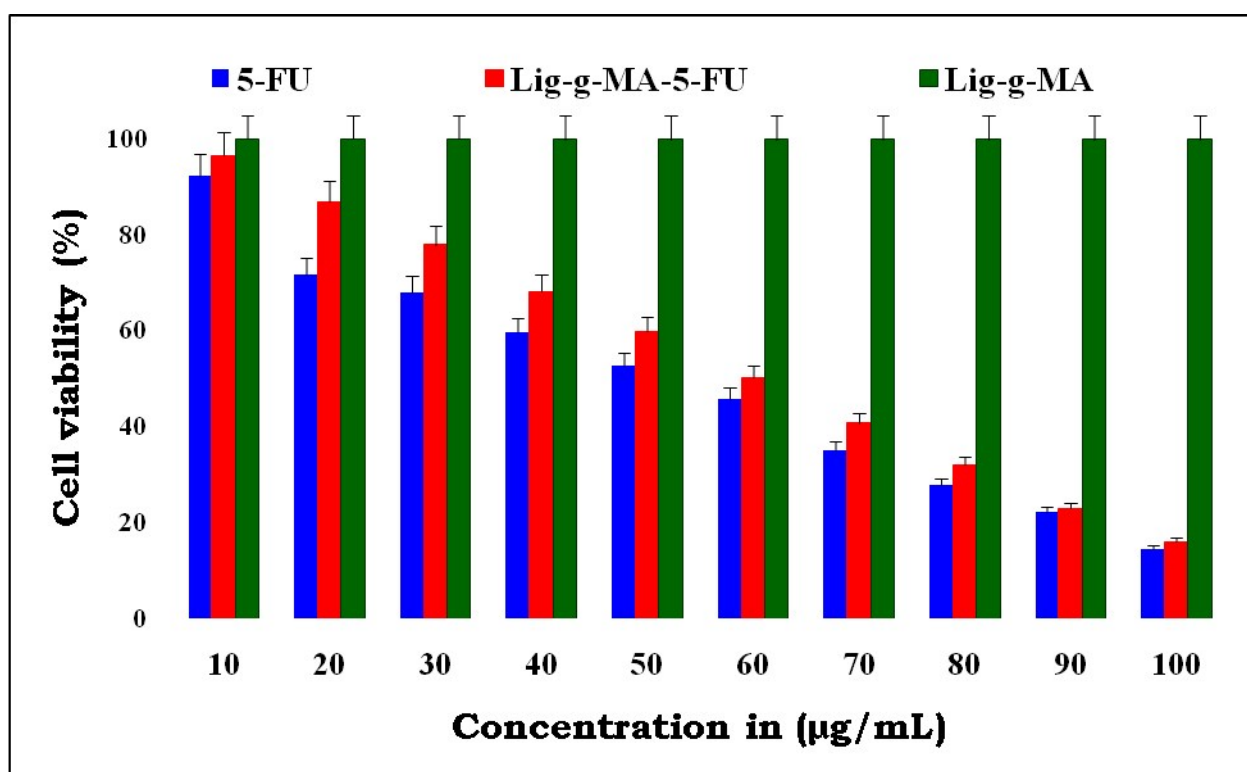

**Fig S9.** Cell viability studies of 5-FU, 5-FU loaded LIG-g-MA holo-nanocarrier and unloaded LIG-g-MA halo-nanocarrier against MCF-7 cells determined by MTT assay. The results represented as mean  $\pm$  standard deviation of three individual experiments. The  $IC_{50}$  values of 5-FU and 5-FU loaded carrier against MCF-7 cells were  $\mu\text{g/mL}$ , respectively.
